# Supplementary material for: The isotopic signatures of nitrous oxide produced by eukaryotic and prokaryotic phototrophs
Source: Copernicus journal article supplement (doi:10.5194/egusphere-2025-2337), 2025-05-28
Supplement: Supplementary file [file egusphere-2025-2337-AC1-supplement.pdf]

| Name   | $\delta^{15}\text{N}_{\text{AIR}}$ | $\delta^{15}\text{N}^{\alpha}_{\text{AIR}}$ | $\delta^{15}\text{N}^{\beta}_{\text{AIR}}$ | $\delta^{18}\text{O}_{\text{VSMOW-SLAP}}$ | $S_{\text{P}}$     |
|--------|------------------------------------|---------------------------------------------|--------------------------------------------|-------------------------------------------|--------------------|
| USGS51 | $+1.32 \pm 0.04 \text{ ‰}$         | $+0.48 \pm 0.09 \text{ ‰}$                  | $+2.15 \pm 0.12 \text{ ‰}$                 | $+41.23 \pm 0.04 \text{ ‰}$               | $-1.67 \text{ ‰}$  |
| USGS52 | $+0.44 \pm 0.02 \text{ ‰}$         | $+13.52 \pm 0.04 \text{ ‰}$                 | $-12.64 \pm 0.05 \text{ ‰}$                | $+40.64 \pm 0.03 \text{ ‰}$               | $+26.15 \text{ ‰}$ |

**Figure 1:** Certified values from USGS51 and USGS52 as shown on the manufacturer certificate.

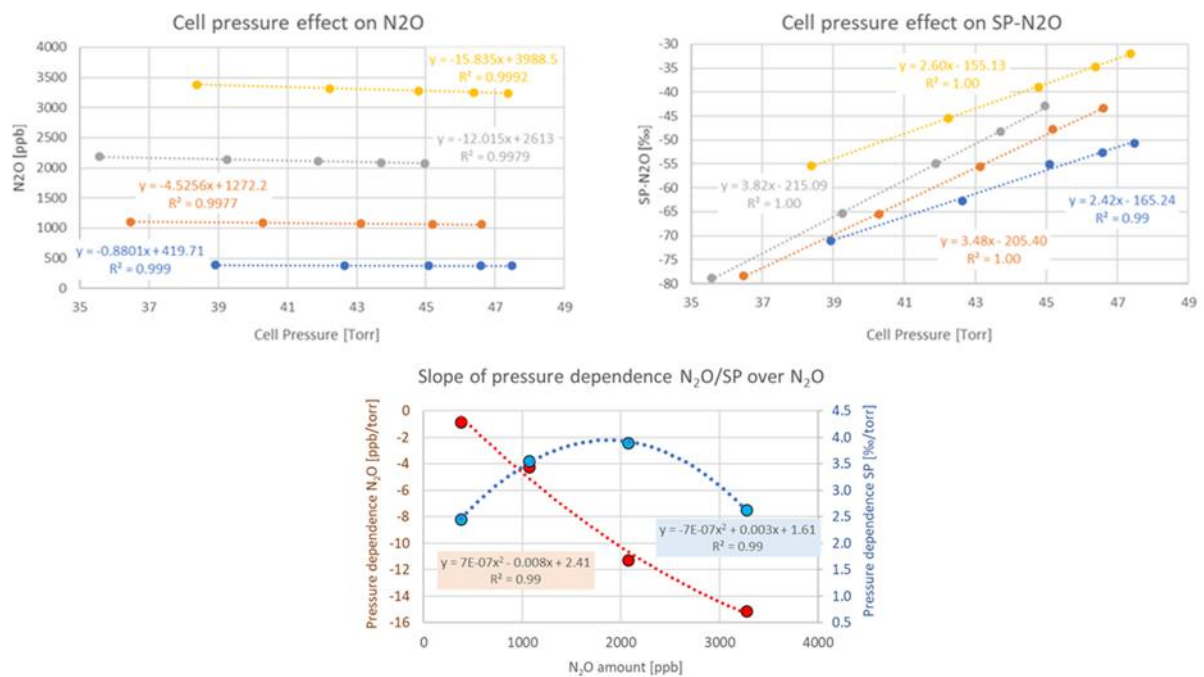

**Figure 2:** Top – left: Pressure effect on N<sub>2</sub>O (ppb). Top – Right: Pressure effect on SP-N<sub>2</sub>O. Bottom: Polynomial fits of the pressure dependence on N<sub>2</sub>O or SP-N<sub>2</sub>O.
